# Supplementary material for: Metabolic Footprints of Burkholderia Sensu Lato Rhizosphere Bacteria Active against Maize Fusarium Pathogens
Source: MDPI journal article supplement (doi:10.3390/microorganisms9102061), 2021-09-29
Supplement: s1 [file s1]

## ***Supplementary Materials***

**Metabolic foot-prints of *Burkholderia* sensu lato rhizosphere bacteria active against maize *Fusarium* pathogens.**

**Guadalupe C. Barrera-Galicia <sup>1</sup>, Héctor A. Peniche-Pavía <sup>1</sup>, Juan J. Peña-Cabriaes <sup>1</sup>, Sergio A. Covarrubias <sup>2</sup>, José A. Vera-Núñez <sup>2</sup> and John P. Délano-Frier <sup>1,\*</sup>**

<sup>1</sup> Centro de Investigación y de Estudios Avanzados del Instituto Politécnico Nacional, Unidad Irapuato, Libramiento Norte Carretera Irapuato León Kilómetro 9.6, Carretera Irapuato León, Irapuato 36824, Guanajuato, México

<sup>2</sup> Universidad Autónoma de Zacatecas, Área de Ciencias de la Salud. Carretera Zacatecas-Guadalajara Km. 6, ejido "La Escondida". Ciudad Universitaria campus Siglo XXI, Zacatecas 98160, Zacatecas, México

\*Correspondence: john.delano@cinvestav.mx; Tel.: +52 462-623-9600

### **This Supporting Information including:**

Figure S1. Congo red agar assay for the qualitative detection of exo-polysaccharides (EPS) production.

Figure S2. DIESI-MSQD spectra of exo-metabolomes from rhizosphere *Burkholderia* sensu lato strains.

Table S1. Phylogenetic similarity of bacteria isolated from maize rhizospheric soil.

Table S2. Fragmentation ion pattern of selected signals obtained from DIESI-MS analysis of rhizospheric *Burkholderia* sensu lato culture supernatant.

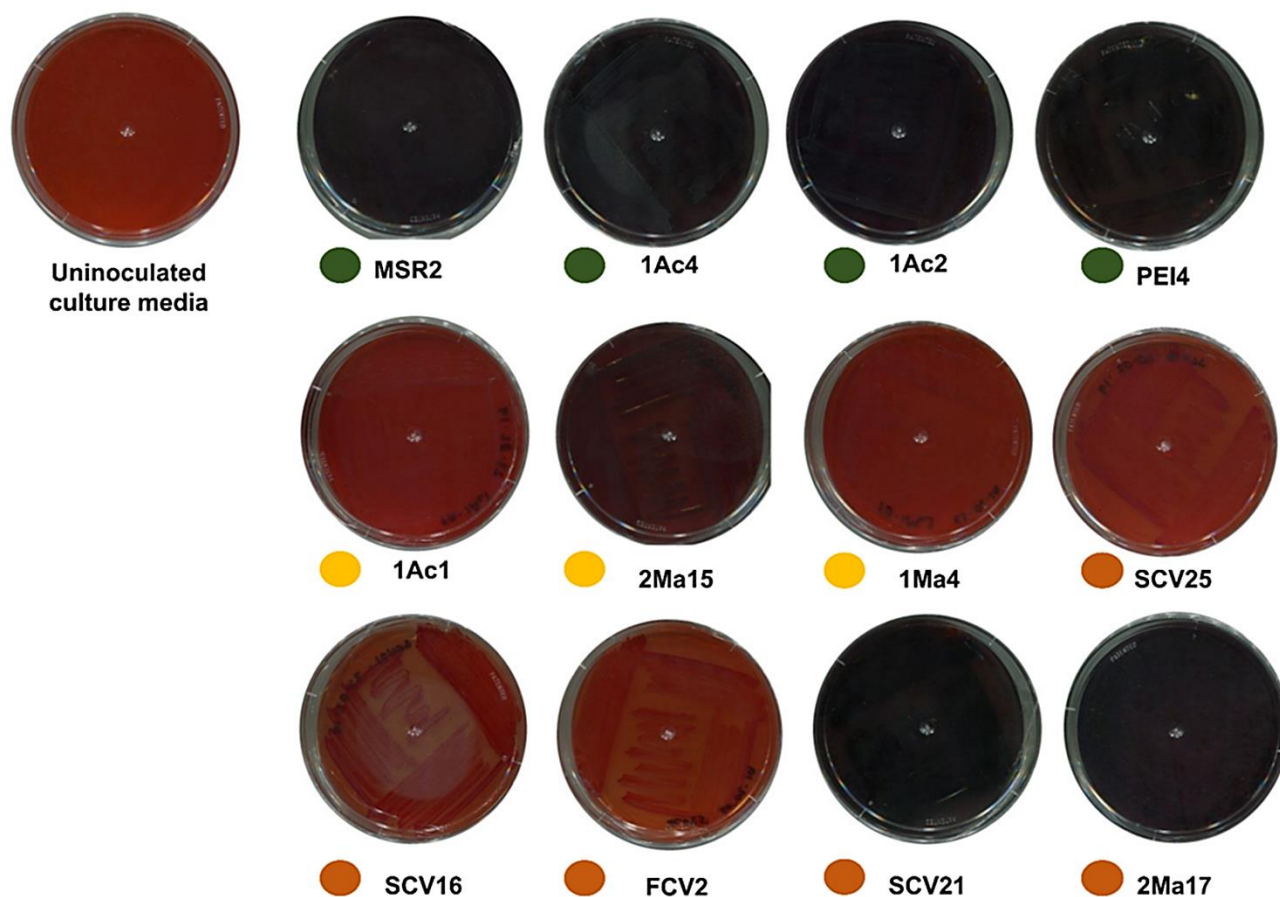

**Figure S1. Congo red agar assay for the qualitative detection of exo-polysaccharides (EPS) production.** An EPS positive result was indicated by the development of black colonies (in dark Petri dishes), while the colonies of non-slime producers remained pink (in red Petri dishes). The single plate in the upper-left side of the image corresponds to the negative control (i.e., uninoculated media). The colored circles below the plates represent the different *Burkholderia* sensu lato groups: green = Clade I; yellow = Clade II, and orange = Clade III.

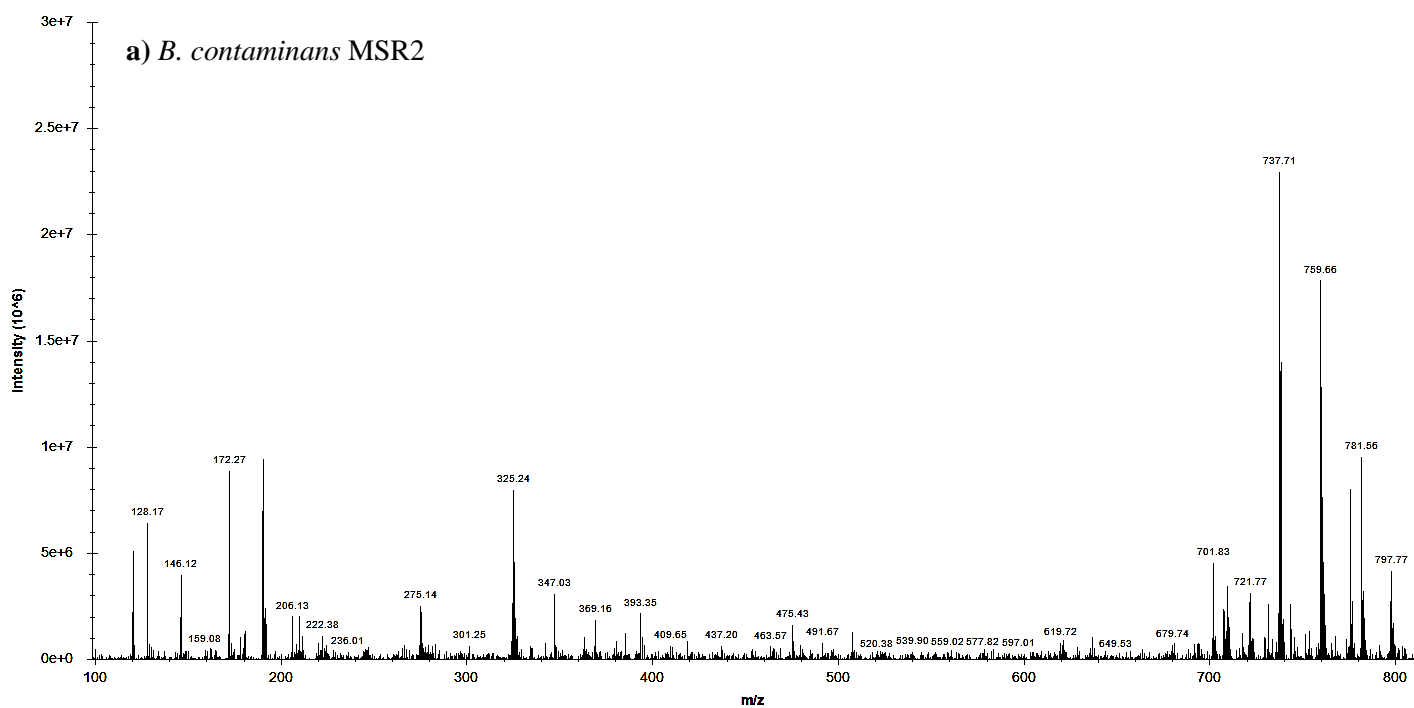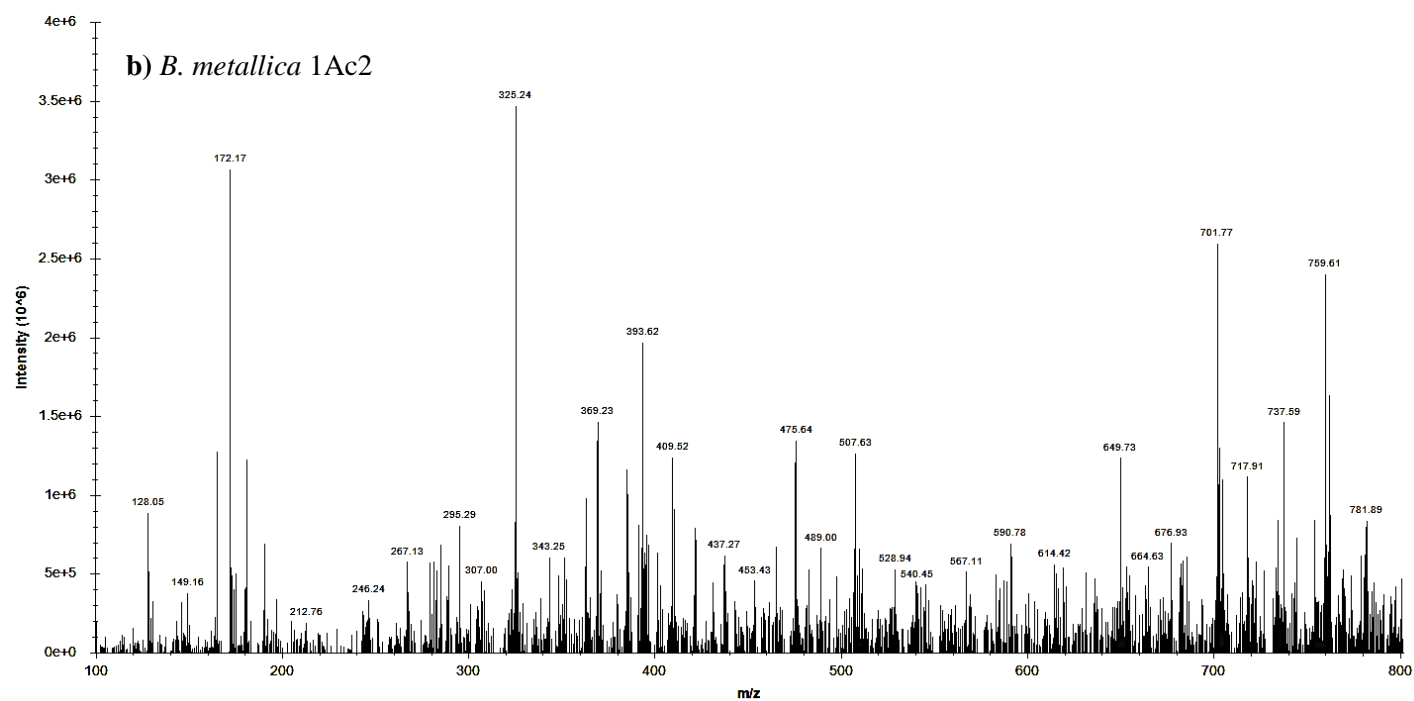

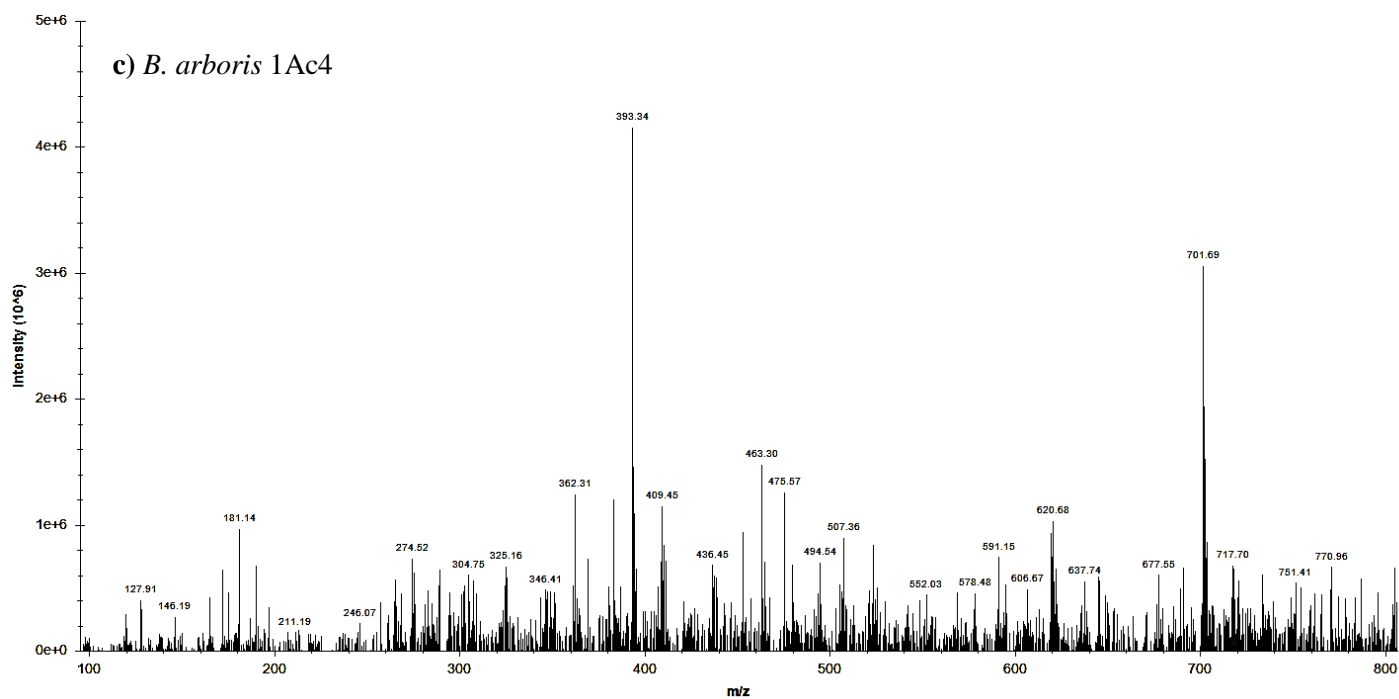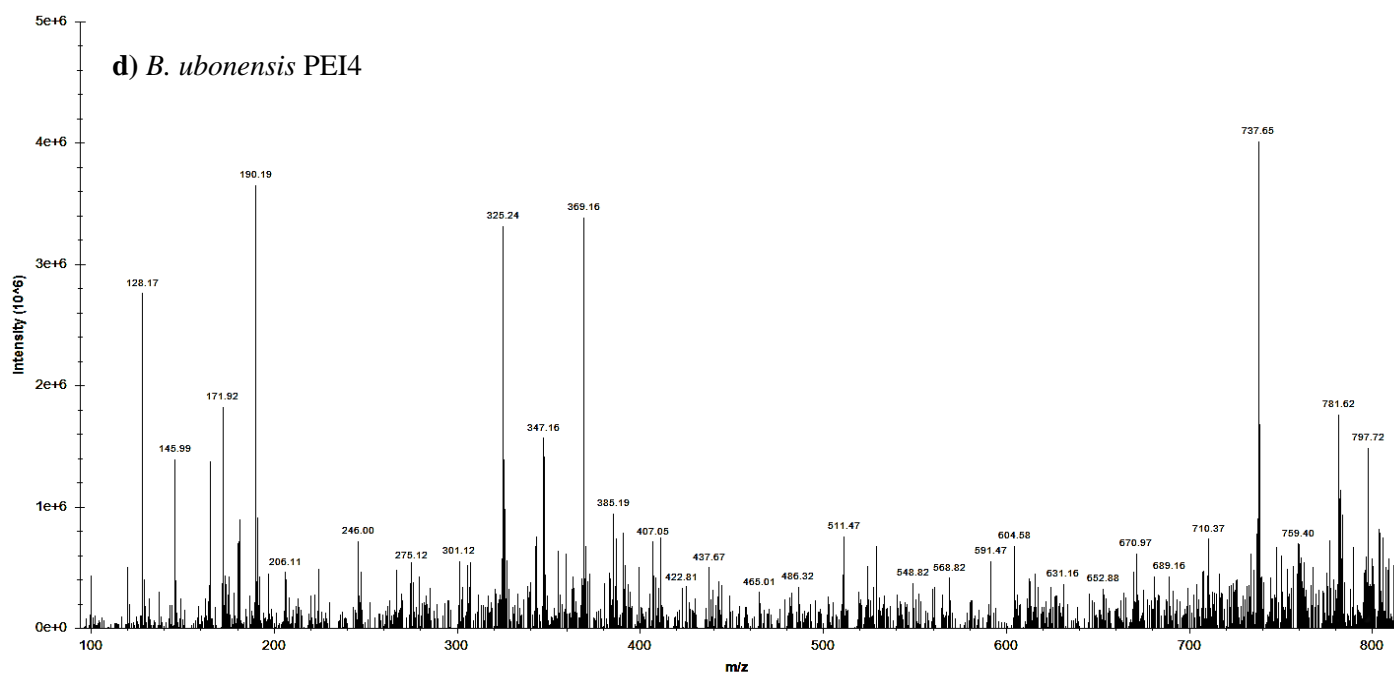

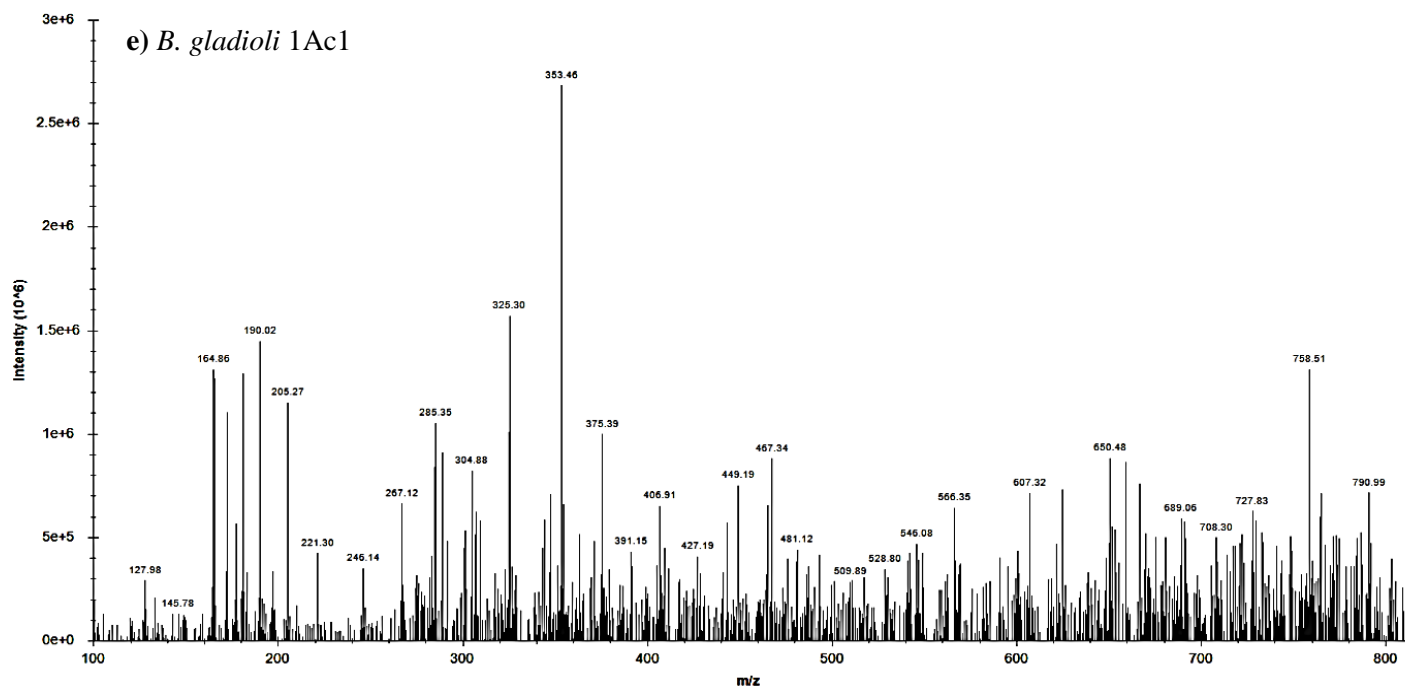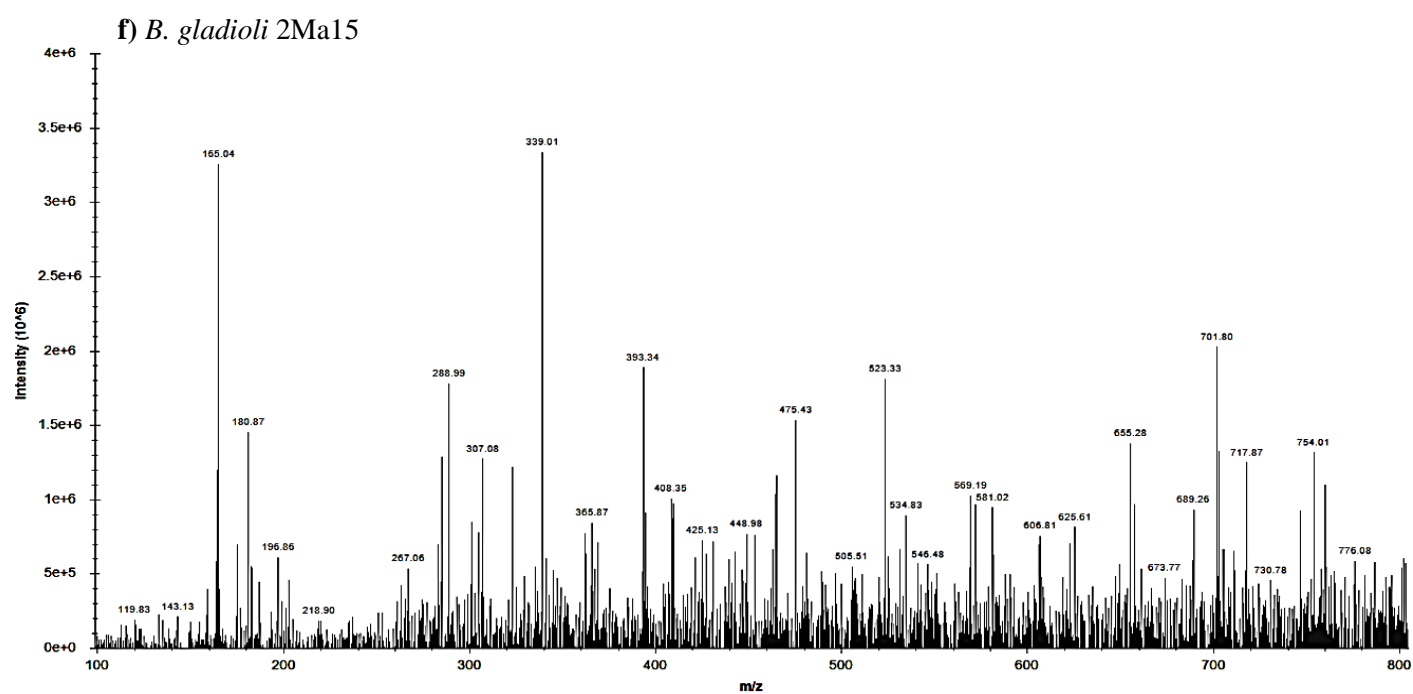

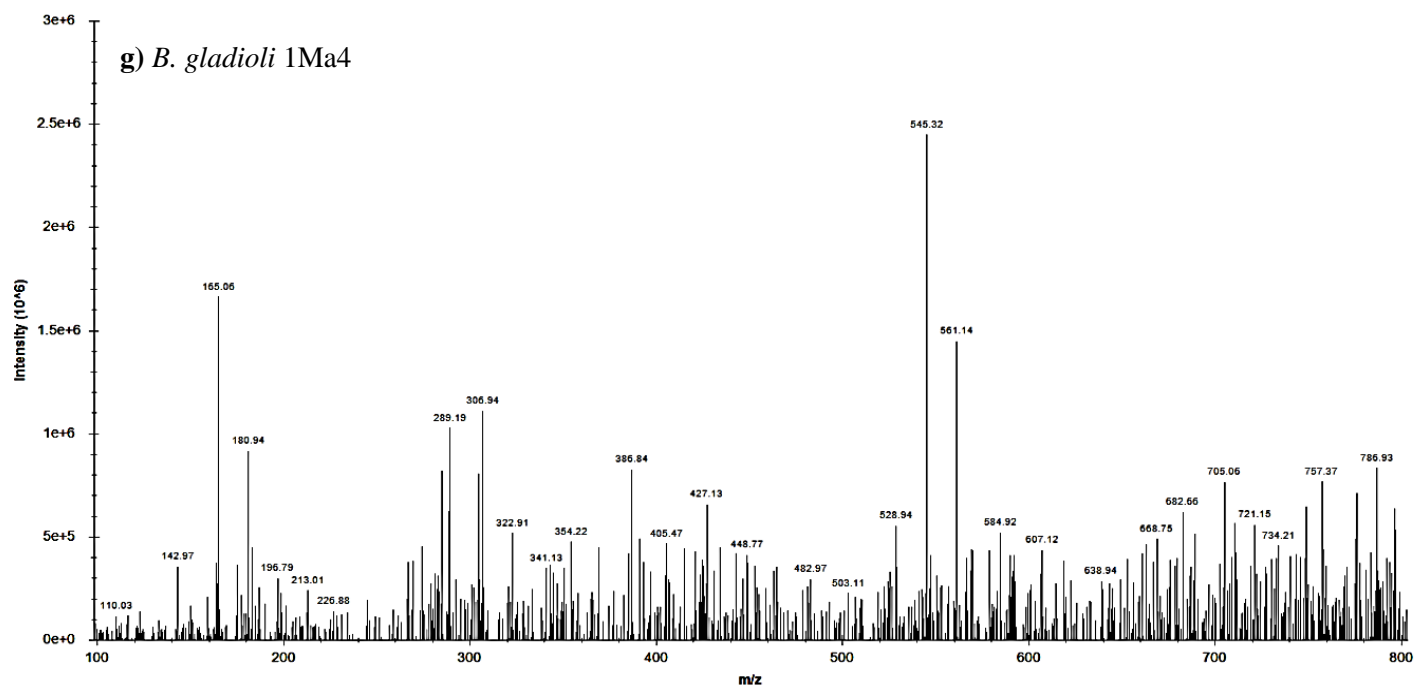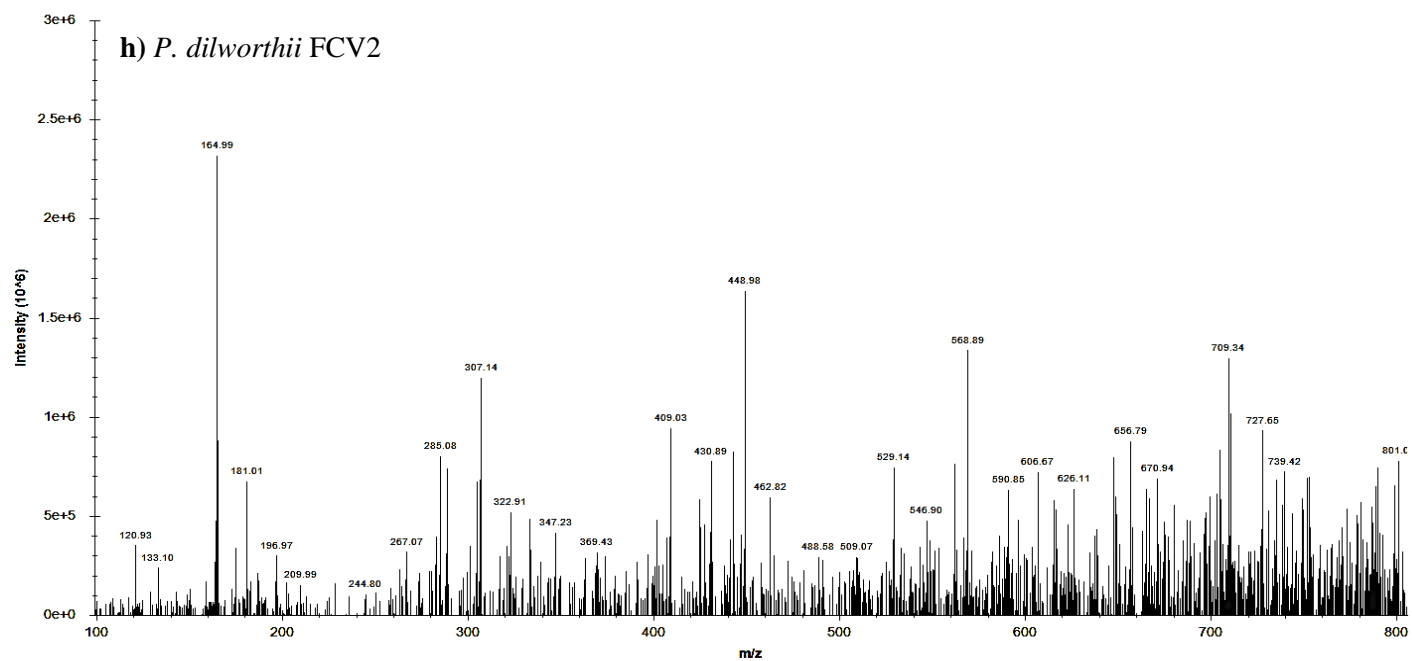

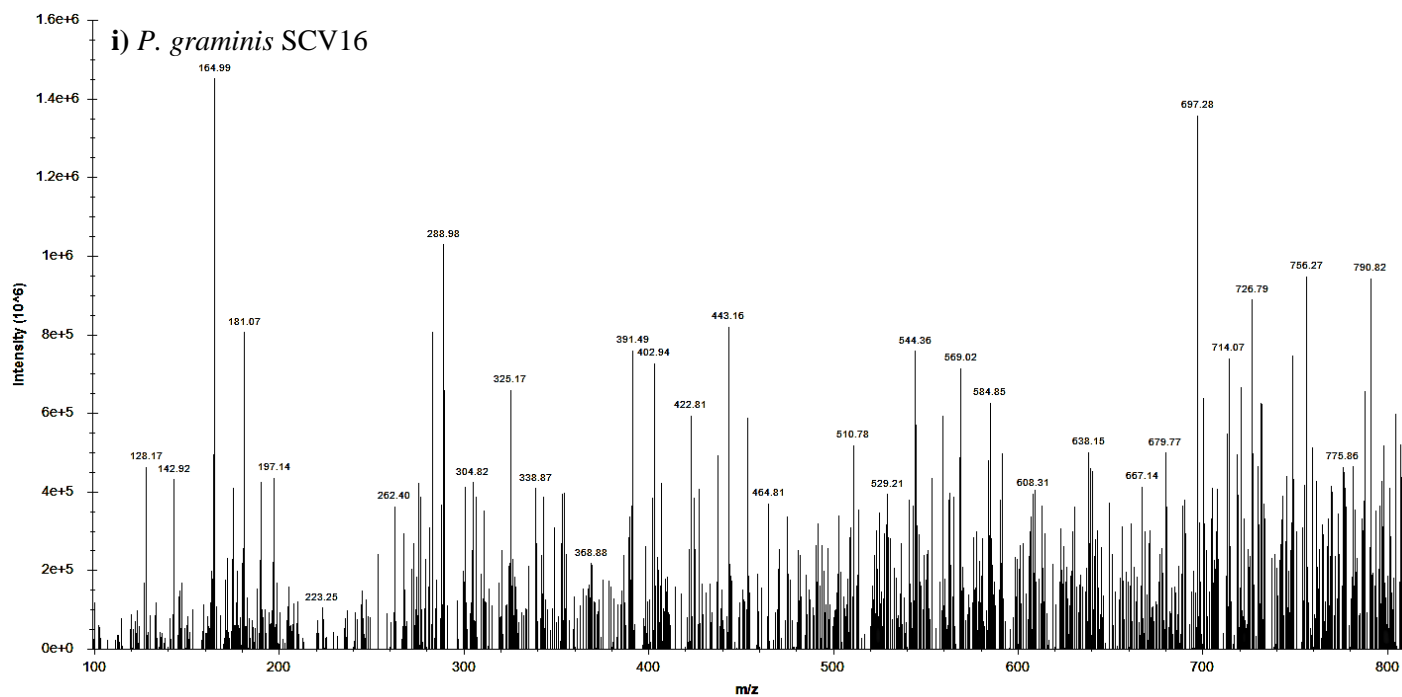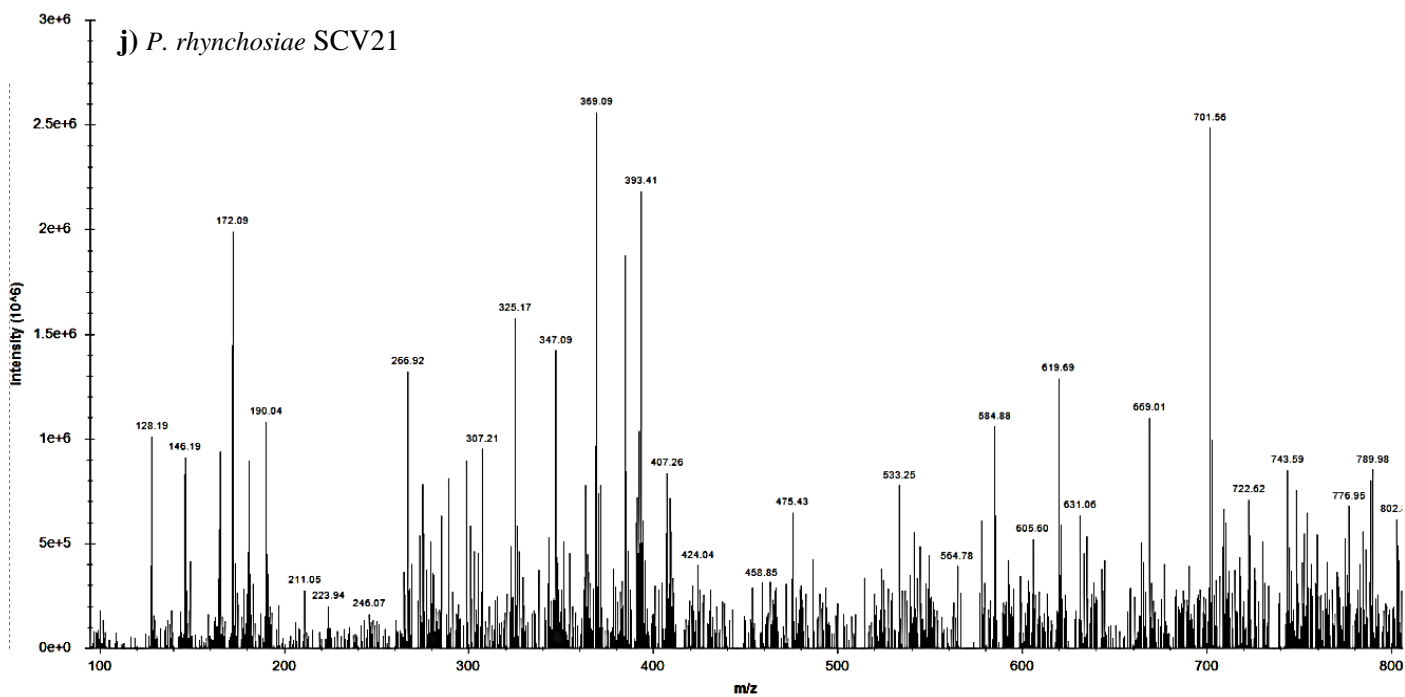

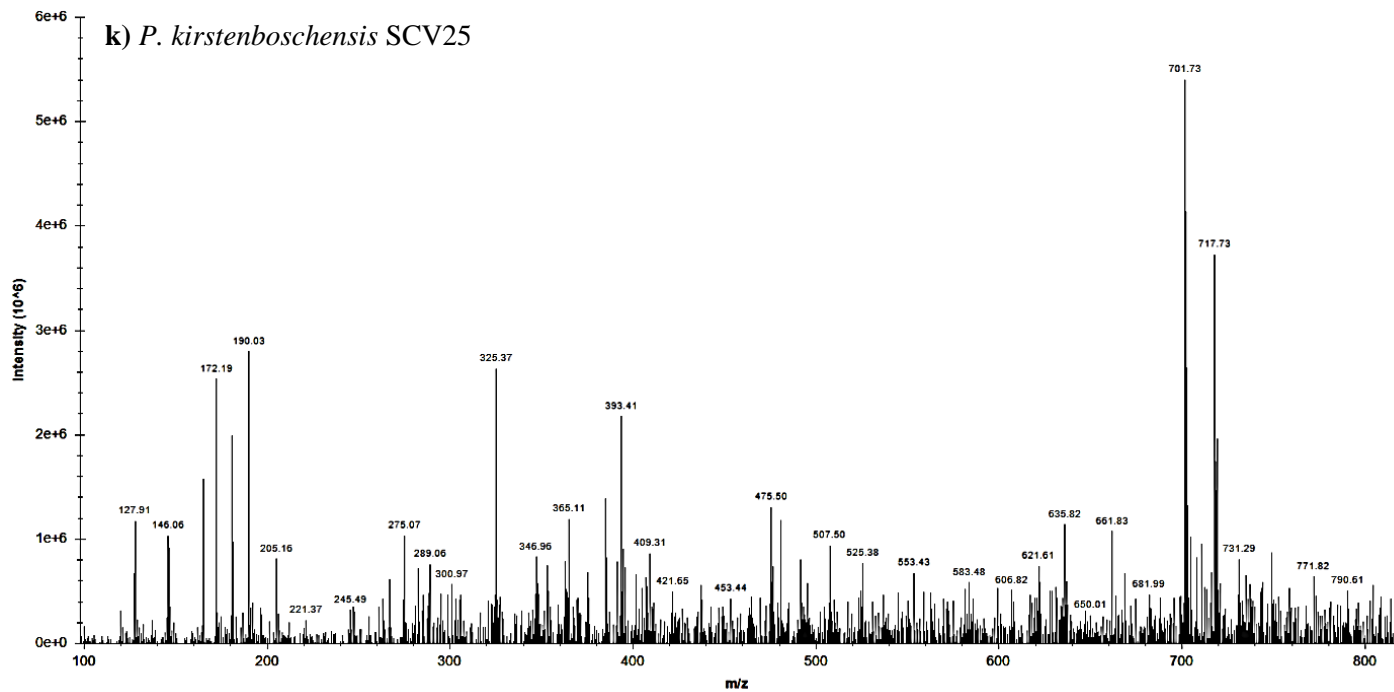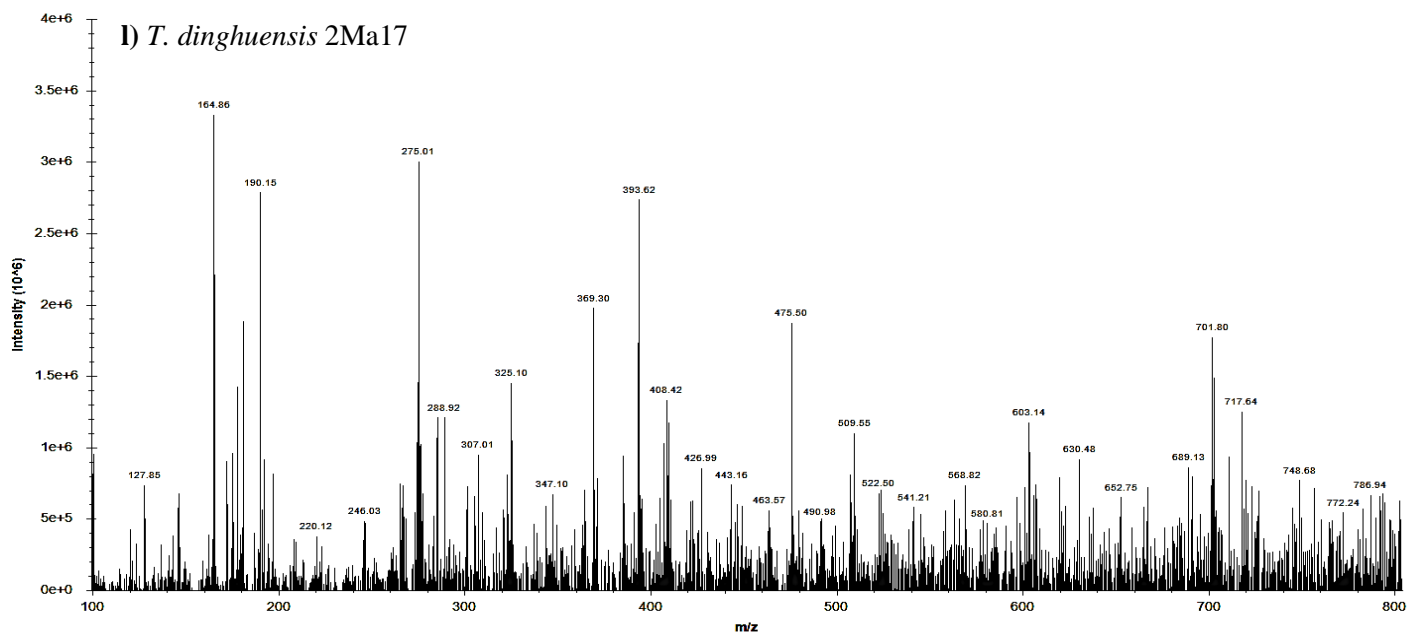



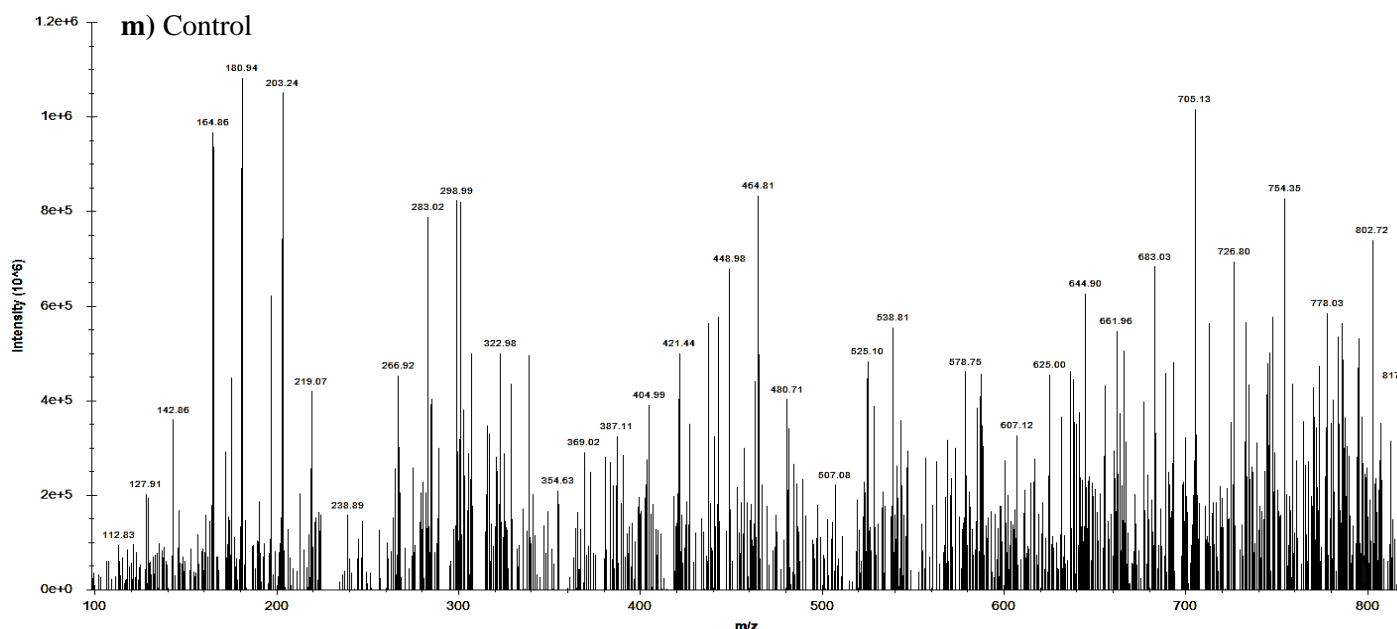

**Figure S2 DIESI-MSQD spectra of exo-metabolomes from rhizosphere *Burkholderia sensu lato* strains.** The x-axis indicates the  $m/z$  ratio, whereas the y-axis plots the relative signal intensity of each ion. The images illustrate a representative foot-print of the bacterial supernatants analyzed. The spectra are organized as follows, Clade I: **a)** *B. contaminans* MSR2; **b)** *B. metallica* 1Ac2; **c)** *B. arboris* 1Ac4, and **d)** *B. ubonensis* PEI4; Clade II: **e)** *B. gladioli* 1Ac1; **f)** *B. gladioli* 2Ma15, and **g)** *B. gladioli* 1Ma4; Clade III: **h)** *P. dilworthii* FCV2; **i)** *P. graminis* SCV16; **j)** *P. rhynchosiae* SCV21; **k)** *P. kirstenboschensis* SCV25, and **l)** *T. dinghuensis* 2Ma17. The last image **m)** Control represents the mass spectrum of uninoculated culture media M9.

**Table S1.** Phylogenetic similarity of bacteria isolated from maize rhizospheric soil.

| <b>Isolate</b> | <b>Identity*</b>            | <b>Strain with highest phylogenetic similarity</b> | <b>Pairwise similarity (%)</b> |
|----------------|-----------------------------|----------------------------------------------------|--------------------------------|
| <b>MSR2</b>    | <i>B. contaminans</i>       | LMG23361                                           | 99.93                          |
| <b>1Ac4</b>    | <i>B. arboris</i>           | R24201(T)                                          | 99.71                          |
| <b>1Ac2</b>    | <i>B. metallica</i>         | AM747632                                           | 99.78                          |
| <b>PEI4</b>    | <i>B. ubonensis</i>         | CIP-107078                                         | 99.31                          |
| <b>1Ac1</b>    | <i>B. gladioli</i>          | NBRC13700                                          | 99.93                          |
| <b>2Ma15</b>   | <i>B. gladioli</i>          | NBRC13700                                          | 99.93                          |
| <b>1Ma4</b>    | <i>B. gladioli</i>          | NBRC13700                                          | 99.71                          |
| <b>SCV16</b>   | <i>P. graminis</i>          | C4D1M(T)                                           | 99.03                          |
| <b>FCV2</b>    | <i>P. dilworthii</i>        | WSM3556                                            | 97.02                          |
| <b>SCV25</b>   | <i>P. kirstenboschensis</i> | Kb15(T)                                            | 97.76                          |
| <b>SCV21</b>   | <i>P. rhynchosiae</i>       | WSM3937                                            | 97.79                          |
| <b>2Ma17</b>   | <i>T. dinghuensis</i>       | DHOM06                                             | 99.05                          |

\* High sequence similarities (> 97%) with the 16S rRNA genes compiled in the EzBioCloud 16S database.

**Table S2.** Fragmentation ion patterns of selected signals obtained from DIESI-MS analysis of rhizospheric *Burkholderia* sensu lato culture supernatants.

| <i>m/z</i> | Ionization mode | MS/MS 10V | MS/MS 20V                                                       | MS/MS 40V                                                      | MS/MS 50V                                       | MS/MS 60eV                                | MS/MS 70eV                                          | Putative identity           | Mol. weight | Mol. Formula                                                                 | Precursor type         | Reference | Id. level (A-D)* |
|------------|-----------------|-----------|-----------------------------------------------------------------|----------------------------------------------------------------|-------------------------------------------------|-------------------------------------------|-----------------------------------------------------|-----------------------------|-------------|------------------------------------------------------------------------------|------------------------|-----------|------------------|
| 190        | Positive        | 190       | 190, 162, 120, 71, 45                                           | 190, 162, 120, 101, 71, 45                                     | -                                               | -                                         | -                                                   | Pyochelin                   | 324.413     | C <sub>14</sub> H <sub>16</sub> N <sub>2</sub> O <sub>3</sub> S <sub>3</sub> | [M-135+H] <sup>+</sup> |           |                  |
| 210        | Positive        | 210       | 210, 120, 91, 73, 57                                            | 210, 178, 120, 118, 91, 73, 57, 45                             | -                                               | -                                         | -                                                   | n.i.                        | -           | -                                                                            | -                      |           |                  |
| 275        | Positive        | 275       | 275                                                             | 275, 137, 123, 112                                             | -                                               | -                                         | -                                                   | n.i.                        | -           | -                                                                            | -                      |           |                  |
| 325        | Positive        | 325, 128  | 325, 224, 206, 190, 172, 146, 128, 100, 70                      | 325, 210, 190, 172, 146, 128, 120, 73, 57, 39                  | -                                               | -                                         | -                                                   | Pyochelin                   | 324.413     | C <sub>14</sub> H <sub>16</sub> N <sub>2</sub> O <sub>3</sub> S <sub>3</sub> | [M+H] <sup>+</sup>     | [53]      | A* <sup>1</sup>  |
| 347        | Positive        | 347, 246  | 347, 303, 269, 246, 190, 168, 156, 128, 94, 85, 23              | 347, 213, 190, 163, 142, 120, 94, 71, 23                       | -                                               | -                                         | -                                                   | Pyochelin                   | 324.413     | C <sub>14</sub> H <sub>16</sub> N <sub>2</sub> O <sub>3</sub> S <sub>3</sub> | [M+Na] <sup>+</sup>    | [53]      | A                |
| 363        | Positive        | 363. 39   | 39                                                              | 39                                                             | -                                               | -                                         | -                                                   | Pyochelin                   | 324.413     | C <sub>14</sub> H <sub>16</sub> N <sub>2</sub> O <sub>3</sub> S <sub>3</sub> | [M+K] <sup>+</sup>     | [53]      | A                |
| 369        | Positive        | 369, 360  | 369, 334, 282, 229, 210, 159, 149, 131, 114, 97, 89, 72, 55, 41 | 243, 200, 184, 149, 131, 114, 86, 72, 55, 41                   | -                                               | -                                         | -                                                   | Bacteriohopane C35 Skeleton | 369.6565    | C <sub>27</sub> H <sub>45</sub> <sup>+</sup>                                 | M <sup>+</sup>         | [54]      | A                |
| 380        | Positive        | 380       | 380                                                             | 380, 378, 334, 247, 227, 191, 131, 114, 97, 89, 86, 72, 70, 23 | -                                               | -                                         | -                                                   | n.i.                        | -           | -                                                                            | -                      |           |                  |
| 391        | Positive        | 390       | 390                                                             | 390, 356, 353, 326, 269, 220, 134, 114, 23                     | -                                               | -                                         | -                                                   | n.i.                        | -           | -                                                                            | [M+Na] <sup>+</sup>    |           |                  |
| 393        | Positive        | 393, 335  | 393, 246, 39                                                    | 393, 159, 130, 114, 39, 23                                     | -                                               | -                                         | -                                                   | n.i.                        | -           | -                                                                            | [M+Na] <sup>+</sup>    |           |                  |
| 409        | Positive        | -         | -                                                               | -                                                              | 409, 404, 353, 282, 265, 262, 178, 138, 122, 39 | 409, 388, 317, 365, 187, 169, 139, 93, 39 | 409, 401, 364, 282, 265, 261, 186, 137, 116, 39     | n.i.                        | -           | -                                                                            | -                      |           |                  |
| 410        | Positive        | -         | -                                                               | -                                                              | 410, 380, 346, 267, 239, 179, 141, 39           | 410, 378, 266, 209, 178, 165, 124, 95, 39 | 410, 405, 352, 316, 265, 222, 197, 165, 119, 63, 39 | n.i.                        | -           | -                                                                            | -                      |           |                  |
| 475        | Positive        | -         | -                                                               | -                                                              | 475, 23                                         | 475, 34                                   | 475, 144, 113, 23                                   | n.i.                        | -           | -                                                                            | -                      |           |                  |

|     |          |   |   |   |                                                      |                                                         |                                                                                   |      |   |   |   |  |  |
|-----|----------|---|---|---|------------------------------------------------------|---------------------------------------------------------|-----------------------------------------------------------------------------------|------|---|---|---|--|--|
| 476 | Positive | - |   | - | 476, 246, 165, 135, 39                               | 476, 389, 268, 73, 23                                   | 476, 470, 453, 431, 332, 181, 138, 40, 23                                         | n.i. | - | - | - |  |  |
| 479 | Positive | - | - | - | 479, 474, 443, 382, 336, 289, 266, 181, 159, 113, 39 | 479, 475, 461, 396, 333, 305, 363, 182, 165, 39         | 479, 477, 473, 455, 388, 382, 380, 352, 319, 304, 279, 202, 182, 165, 158, 39, 23 | n.i. | - | - | - |  |  |
| 480 | Positive | - | - | - | 480, 477, 435, 365, 335, 266, 165, 114, 39, 23       | 480, 475, 453, 402, 336, 253, 237, 193, 141, 42, 39, 23 | 480, 476, 474, 456, 391, 369, 274, 151, 102, 39, 23                               | n.i. | - | - | - |  |  |
| 491 | Positive | - | - | - | 491, 489, 487, 430, 371, 347, 238, 165, 143, 39      | 491, 489, 487, 430, 376, 349, 178, 151, 88, 39          | 491, 488, 475, 432, 426, 348, 229, 181, 142, 39, 23                               | n.i. | - | - | - |  |  |
| 492 | Positive | - | - | - | 492, 489, 23                                         | 492, 489, 429, 357, 348, 158, 142, 44, 39, 23           | 492, 489, 484, 469, 410, 380, 305, 264, 248, 151, 122, 57, 38, 22                 | n.i. | - | - | - |  |  |
| 507 | Positive | - | - | - | 507, 502, 431, 388, 340, 268, 251, 231, 181, 164, 38 | 507, 501, 426, 379, 322, 265, 229, 122, 38, 23          | 506, 502, 448, 423, 370, 329, 289, 267, 185, 165, 135, 39, 23                     | n.i. | - | - | - |  |  |
| 508 | Positive | - | - | - | 508, 503, 491, 409, 381, 301, 264, 25                | 508, 503, 409, 360, 312, 278, 209, 165, 135, 39         | 506, 483, 418, 406, 240, 174, 32, 23                                              | n.i. | - | - | - |  |  |
| 509 | Positive | - | - | - | 509, 428, 411, 410, 338, 266, 40, 37                 | 509, 479, 429, 411, 389, 252, 162, 143, 113, 41, 39, 36 | 507, 475, 423, 348, 377, 328, 279, 250, 208, 206, 153, 113, 39, 23                | n.i. | - | - | - |  |  |
| 521 | Positive | - | - | - | 521, 517, 445, 401, 328, 286, 198, 165, 45, 39       | 521, 517, 514, 456, 407, 356, 288, 183, 177, 165, 38    | 521, 516, 445, 397, 383, 303, 267, 228, 187, 165, 102, 39, 23                     | n.i. | - | - | - |  |  |
| 523 | Positive | - | - | - | 523, 491, 445, 409, 405, 380, 359, 282, 238, 39      | 523, 490, 459, 420, 411, 363, 288, 263, 165, 39         | 522, 491, 486, 484, 458, 447, 379, 333, 286, 266, 188, 164, 120, 97, 39           | n.i. | - | - | - |  |  |
| 524 | Positive | - | - | - | 524, 521, 492, 380, 300, 249, 207, 165, 102, 86, 39  | 523, 492, 460, 394, 289, 181, 165, 39                   | 523, 519, 488, 486, 359, 286, 240, 41                                             | n.i. | - | - | - |  |  |

|     |          |   |   |   |                                       |                                                                                    |                                                                                             |                               |         |                                                                |                         |      |                 |
|-----|----------|---|---|---|---------------------------------------|------------------------------------------------------------------------------------|---------------------------------------------------------------------------------------------|-------------------------------|---------|----------------------------------------------------------------|-------------------------|------|-----------------|
| 619 | Positive | - | - | - | 619, 559, 462, 421, 23                | 619, 608, 527, 463, 383, 23                                                        | 618, 552, 520, 450, 430, 356, 165, 37                                                       | n.i.                          | -       | -                                                              | -                       |      |                 |
| 622 | Positive | - | - | - | 621, 613, 595, 502, 458, 422, 374     | 622, 602, 585, 401, 214, 192, 112                                                  | 622, 613, 576, 478, 264, 196, 179, 160, 33                                                  | n.i.                          | -       | -                                                              | -                       |      |                 |
| 635 | Positive | - | - | - | 635, 515, 491, 394, 359, 338, 39, 21  | 635, 522, 491, 393, 265, 181, 149, 39                                              | 636, 576, 523, 495, 478, 464, 393, 350, 283, 189, 164, 112, 39                              | n.i.                          | -       | -                                                              | -                       |      |                 |
| 636 | Positive | - | - | - | 636, 581, 525, 491, 427, 394, 387, 39 | 635, 595, 491, 393, 368, 283, 39                                                   | 363, 613, 576, 394, 165, 143, 39                                                            | n.i.                          | -       | -                                                              | -                       |      |                 |
| 701 | Positive | - | - | - | 701                                   | 701, 568, 319, 213, 20                                                             | 701, 20                                                                                     | n.i.                          | -       | -                                                              | -                       |      |                 |
| 702 | Positive | - | - | - | 702, 643, 574, 543, 37                | 702, 523, 28                                                                       | 702, 526, 412, 383, 287, 175, 22                                                            | n.i.                          | -       | -                                                              | -                       |      |                 |
| 709 | Positive | - | - | - | 709, 661, 592, 431, 361, 348          | 709, 693, 641, 607, 571, 502, 469, 384, 321, 175, 158, 113, 39                     | 709, 677, 633, 517, 381, 304, 165, 148, 59,                                                 | n.i.                          | -       | -                                                              | -                       |      |                 |
| 709 | Positive | - | - | - | 709, 675, 383, 237, 185, 89           | 709, 633, 563, <b>465</b> , 405, <b>334</b> , 283, 245, 222, 200, 130, 114, 89, 86 | 709, 691, 550, <b>465</b> , 405, 365, <b>334</b> , 310, 283, 222, 212, 183, 113, 89, 86, 68 | Ornibactin C6                 | 708.767 | C <sub>28</sub> H <sub>52</sub> N <sub>8</sub> O <sub>13</sub> | [M+H] <sup>+</sup>      | [55] | B* <sup>2</sup> |
| 721 | Positive | - | - | - | 721, 333, 89                          | 721, 717, 703, 559, 465, 437, 404, 334, 228, 211, 98, 97, 86, 70                   | 721, 703, 561, 475, 449, 333, 318, 257, 231, 202, 131, 98, 70                               | Ornibactin C6                 | 708.767 | C <sub>28</sub> H <sub>52</sub> N <sub>8</sub> O <sub>13</sub> | [M+Na] <sup>+</sup>     |      | C               |
| 722 | Positive | - | - | - | 722                                   | 722, 704, 610, 333, 231, 72                                                        | 251, 236, 231, 159, 131, 98, 70                                                             | n.i.                          | -       | -                                                              | -                       |      |                 |
| 737 | Positive | - | - | - | 737, <b>465</b> , 334, 247            | 737, <b>465</b> , 334, 247, 131, 89, 70                                            | 737, <b>465</b> , 334, 247, 131, 89, 86, 70                                                 | Ornibactin C8                 | 736.821 | C <sub>30</sub> H <sub>56</sub> N <sub>8</sub> O <sub>13</sub> | [M+H] <sup>+</sup>      | [55] | B* <sup>3</sup> |
| 759 | Positive | - | - | - | 759, 685, 599, 582, 426, 357, 29      | 685, 599, 487, 356, 269, 221, 189, 38                                              | 685, 556, 487, 425, 356, 330, 269, 175, 39, 23                                              | Ornibactin C8                 | 736.821 | C <sub>30</sub> H <sub>56</sub> N <sub>8</sub> O <sub>13</sub> | [M+Na(23)] <sup>+</sup> |      | C               |
| 760 | Positive | - | - | - | -                                     | 760, 742, <b>356</b> , 326, 242, 155, 67                                           | 760, 742, 686, 560, 586, 516, 426, <b>356</b> , 335, 235, 209, 136, 39                      | Ornibactin C8<br>(isotope +1) | 737.821 | C <sub>30</sub> H <sub>56</sub> N <sub>8</sub> O <sub>14</sub> | [M+Na(23)] <sup>+</sup> |      |                 |

|     |          |               |                              |                                       |                                      |                                                |                                                               |                    |         |                                                                              |                        |      |   |
|-----|----------|---------------|------------------------------|---------------------------------------|--------------------------------------|------------------------------------------------|---------------------------------------------------------------|--------------------|---------|------------------------------------------------------------------------------|------------------------|------|---|
| 775 | Positive | -             | -                            | -                                     | 775, 756, 649, 634, 372, 330, 39, 23 | 775, 756, 702, 634, 572, 439, 372, 181, 39, 23 | 775, 756, 731, 702, 634, 580, 442, 372, 222, 39, 23           | Ornibactin C8      | 736.821 | C <sub>30</sub> H <sub>56</sub> N <sub>8</sub> O <sub>13</sub>               | [M+K(39)] <sup>+</sup> |      | C |
| 780 | Positive | -             | -                            | -                                     | 781, 455, 356, 173, 21               | -                                              | 781, 682, 607, 542, 455, 443, 387, 335, 291, 205, 161, 91, 39 | n.i.               | -       | -                                                                            | -                      |      |   |
| 782 | Positive | -             | -                            | -                                     | 782, 746, 677, 620, 460              | 782, 443                                       | 782, 456, 441, 388, 264, 219, 39                              | n.i.               | -       | -                                                                            | -                      |      |   |
| 797 | Positive | -             | -                            | -                                     | 797, 567, 471, 403, 375              | 797, 686, 471, 404, 39                         | 797, 782, 686, 471, 247, 146, 39                              | n.i.               | -       | -                                                                            | [M+K(39)] <sup>+</sup> |      |   |
| 178 | Negative | -             | 178, 118                     | 178, 173, 143, 118                    | -                                    | -                                              | -                                                             | Pyochelin          | 324.413 | C <sub>14</sub> H <sub>16</sub> N <sub>2</sub> O <sub>3</sub> S <sub>3</sub> | [M-H-148]-             |      | A |
| 204 | Negative | 204           | 204, 176, 118                | 204, 202, 199, 176, 144, 118          | -                                    | -                                              | -                                                             | Pyochelin          | 324.413 | C <sub>14</sub> H <sub>16</sub> N <sub>2</sub> O <sub>3</sub> S <sub>3</sub> | [M-H-119]-             |      | A |
| 206 | Negative | 206, 118      | 206, 176, 118                | 206, 176, 161, 118, 108, 91           | -                                    | -                                              | -                                                             | Pyochelin          | 324.413 | C <sub>14</sub> H <sub>16</sub> N <sub>2</sub> O <sub>3</sub> S <sub>3</sub> | [M-H-117]-             |      | A |
| 222 | Negative | 222, 118      | 222                          | 222, 189, 118                         | -                                    | -                                              | -                                                             | Pyochelin          | 324.413 | C <sub>14</sub> H <sub>16</sub> N <sub>2</sub> O <sub>3</sub> S <sub>3</sub> | [M-H-101]-             |      | A |
| 245 | Negative | 245           | 245, 189, 126, 118           | 245, 215, 202, 189, 118               | -                                    | -                                              | -                                                             | Pyochelin          | 324.413 | C <sub>14</sub> H <sub>16</sub> N <sub>2</sub> O <sub>3</sub> S <sub>3</sub> | [M-H-78]-              |      | A |
| 261 | Negative | 261, 243      | 261, 246, 243, 228, 201, 118 | 261, 259, 243, 206, 134, 118, 79      | -                                    | -                                              | -                                                             | Pyochelin          | 324.413 | C <sub>14</sub> H <sub>16</sub> N <sub>2</sub> O <sub>3</sub> S <sub>3</sub> | [M-H-62]-              |      | A |
| 323 | Negative | 323, 245, 222 | 323, 245, 222, 178, 118      | 322, 245, 222, 189, 178, 118          | -                                    | -                                              | -                                                             | Pyochelin          | 324.413 | C <sub>14</sub> H <sub>16</sub> N <sub>2</sub> O <sub>3</sub> S <sub>3</sub> | [M-H]-                 | [53] | A |
| 345 | Negative | 345           | 345, 301, 244                | 345, 300, 244, 183, 163, 138, 118, 89 | -                                    | -                                              | -                                                             | Pyochelin          | 324.413 | C <sub>14</sub> H <sub>16</sub> N <sub>2</sub> O <sub>3</sub> S <sub>3</sub> | [M-Na-2H]-             |      | A |
| 609 | Negative | 609           | 609                          | 609, 602, 492                         | -                                    | -                                              | -                                                             | n.i.               | -       | -                                                                            | -                      |      |   |
| 647 | Negative | 647, 323      | 647, 323                     | 647, 323, 245, 222, 178, 118          | -                                    | -                                              | -                                                             | Pyochelin          | 324.413 | C <sub>14</sub> H <sub>16</sub> N <sub>2</sub> O <sub>3</sub> S <sub>3</sub> | [2M-H]-                |      | C |
| 719 | Negative | -             | 719, 630                     | -                                     | 719, 386                             | -                                              | -                                                             | Deoxyornibactin C8 | 720.821 | C <sub>30</sub> H <sub>56</sub> N <sub>8</sub> O <sub>11</sub>               | [M-H]-                 |      | C |
| 735 | Negative | -             | 735                          | 735, 700, 470, 427                    | -                                    | 735, 427, 397, 285                             | -                                                             | Ornibactin C8      | 736.821 | C <sub>30</sub> H <sub>56</sub> N <sub>8</sub> O <sub>13</sub>               | [M-H]-                 | [55] | B |

\* **Link for database:** <sup>1</sup>[mona.fiehnlab.ucdavis.edu/spectra/display/CCMSLIB00005724305](https://mona.fiehnlab.ucdavis.edu/spectra/display/CCMSLIB00005724305); <sup>2</sup>[mona.fiehnlab.ucdavis.edu/spectra/display/CCMSLIB00001059072](https://mona.fiehnlab.ucdavis.edu/spectra/display/CCMSLIB00001059072); <sup>3</sup>[mona.fiehnlab.ucdavis.edu/spectra/display/CCMSLIB00001059073](https://mona.fiehnlab.ucdavis.edu/spectra/display/CCMSLIB00001059073)

#**Identification Level:** **A**(Standard), **B** (MS/MS + Reference) and **C** (MS/MS)
